# Supplementary material
Source: Springer Nature journal article supplement (https://www.springermedizin.de/resource/supplementary/12885_2010_2495_MOESM1_ESM.pdf/9461744)

## Health District Type

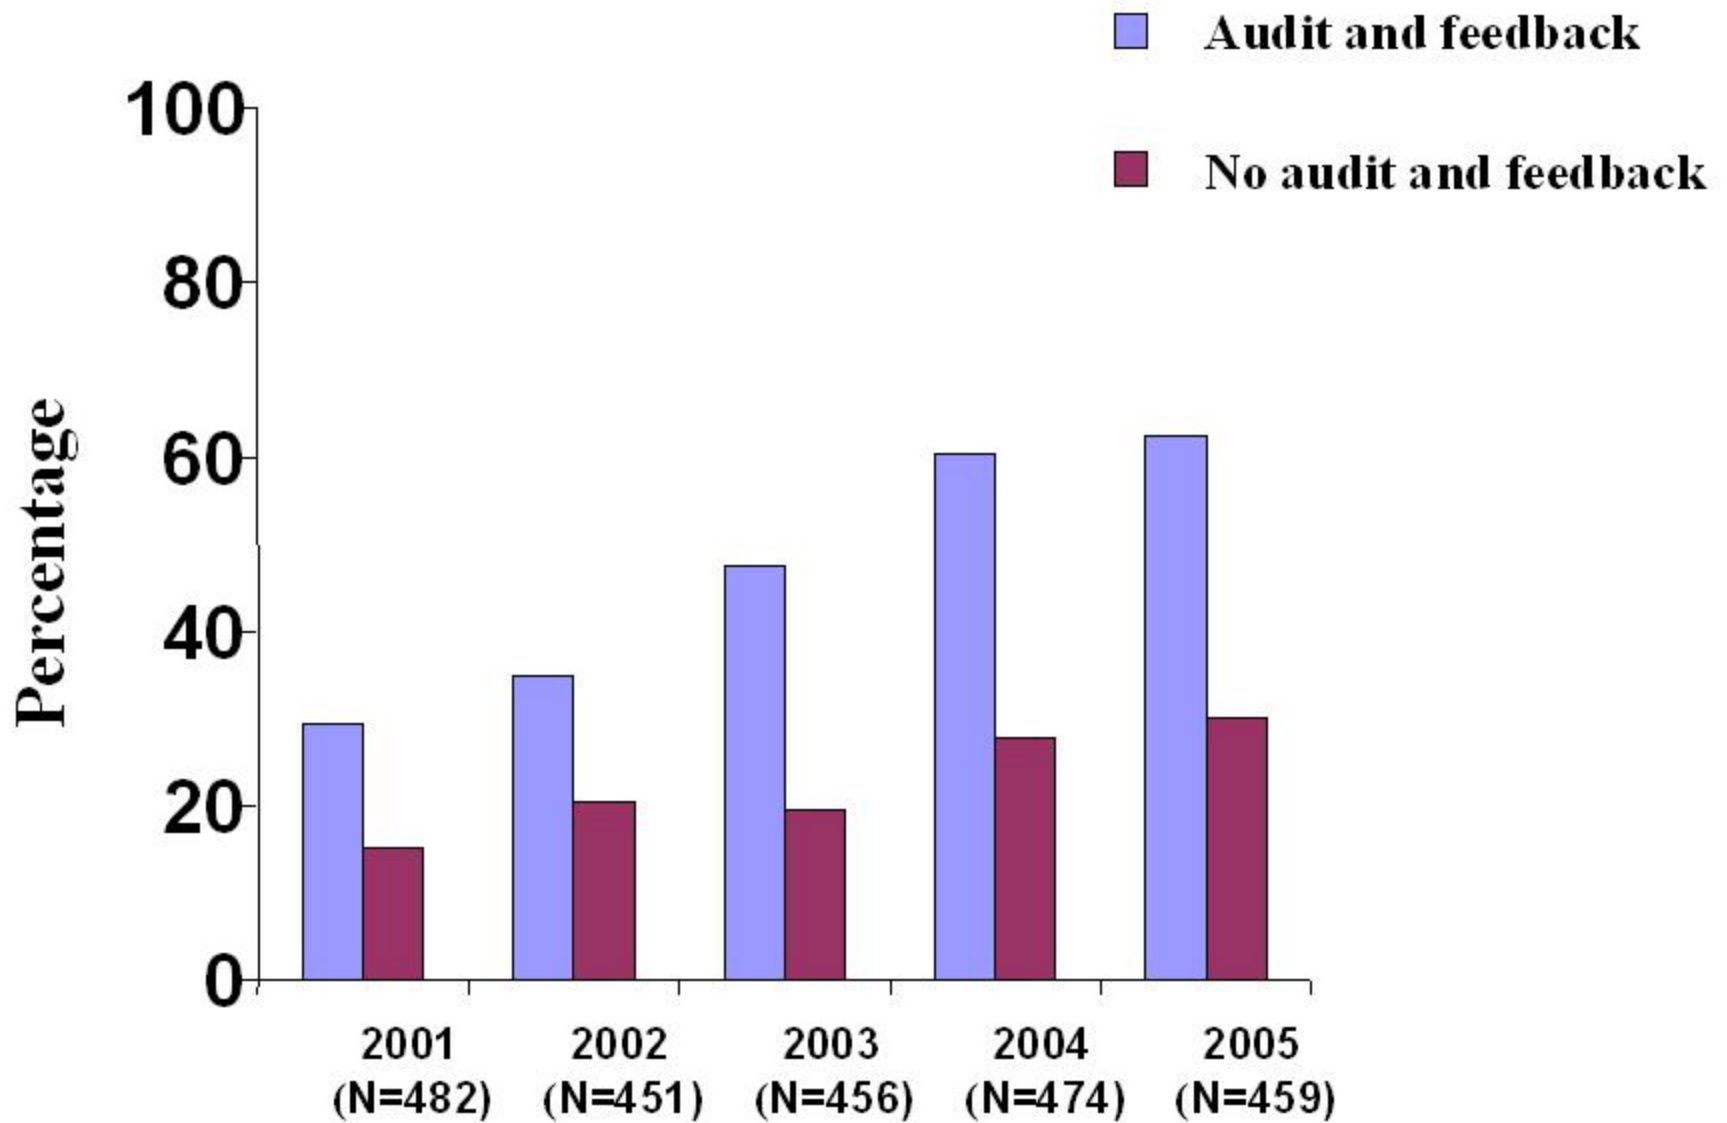

Supplement: MOESM1 [file 9461744]
